# Supplementary material for: Robertkochia solimangrovi sp. nov., isolated from mangrove soil, and emended description of the genus Robertkochia
Source: PubMed Central journal article supplement (PMC7386787; doi:10.1099/ijsem.0.003970), 2020-01-24
Supplement: ijsem-70-1769-s001.pdf [file ijsem-70-1769-s001.pdf]

## Supplementary Materials

### ***Robertkochia solimangrovi* sp. nov., isolated from mangrove soil, and emended description of the genus *Robertkochia***

Ming Quan Lam<sup>1</sup>, Maša Vodovnik<sup>2</sup>, Maša Zorec<sup>2</sup>, Sye Jinn Chen<sup>1</sup>, Kian Mau Goh<sup>1</sup>, Adibah Yahya<sup>1</sup>, Madihah Md Salleh<sup>1</sup>, Zaharah Ibrahim<sup>1</sup>, Lili Tokiman<sup>3</sup>, Simon J. McQueen-Mason<sup>4</sup>, Neil C. Bruce<sup>4\*</sup> and Chun Shiong Chong<sup>1\*</sup>

<sup>1</sup> Department of Biosciences, Faculty of Science, Universiti Teknologi Malaysia, 81310 Skudai, Johor, Malaysia

<sup>2</sup> Biotechnical Faculty, University of Ljubljana, Groblje 3, 1230 Domzale, Slovenija

<sup>3</sup> Johor National Parks Corporation, Kota Iskandar, 79575 Iskandar Puteri, Johor, Malaysia

<sup>4</sup> Centre for Novel Agricultural Products, Department of Biology, University of York, Wentworth Way, York, YO10 5DD, United Kingdom

**\*Correspondence:** Chun Shiong Chong, [cschong@utm.my](mailto:cschong@utm.my); Neil C. Bruce, [neil.bruce@york.ac.uk](mailto:neil.bruce@york.ac.uk)

Supplementary figures

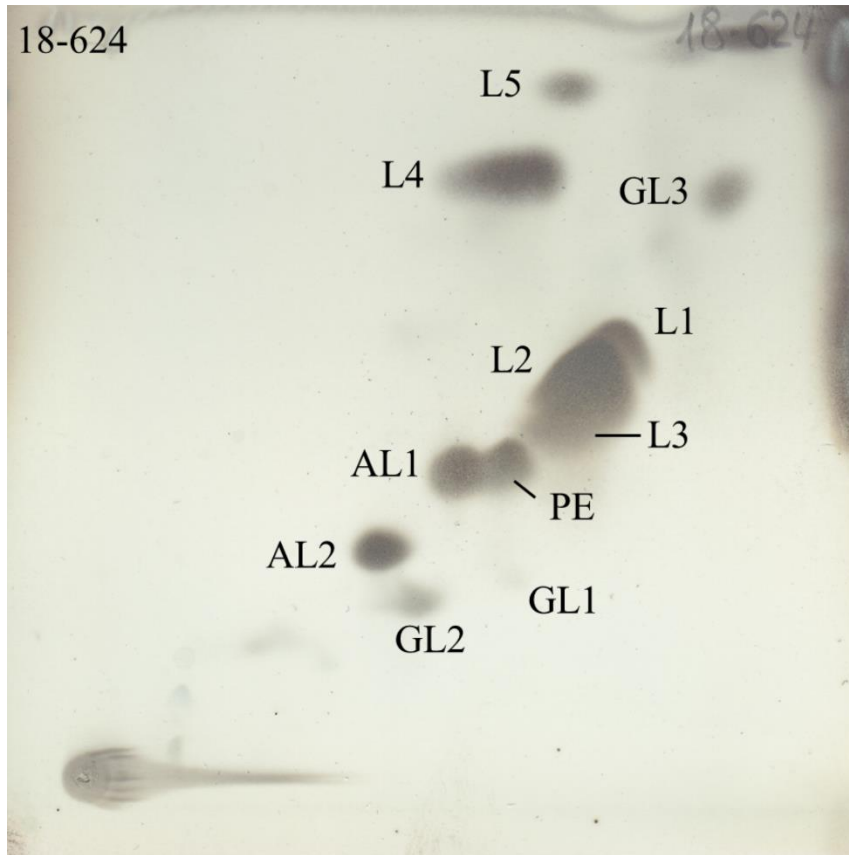

**Fig. S1.** Polar lipids profile of strain CL23<sup>T</sup>. Unidentified lipids; L1–L5, phosphatidylethanolamine; PE, unidentified aminolipids; AL1–AL2, unidentified glycolipids; GL1–GL3.

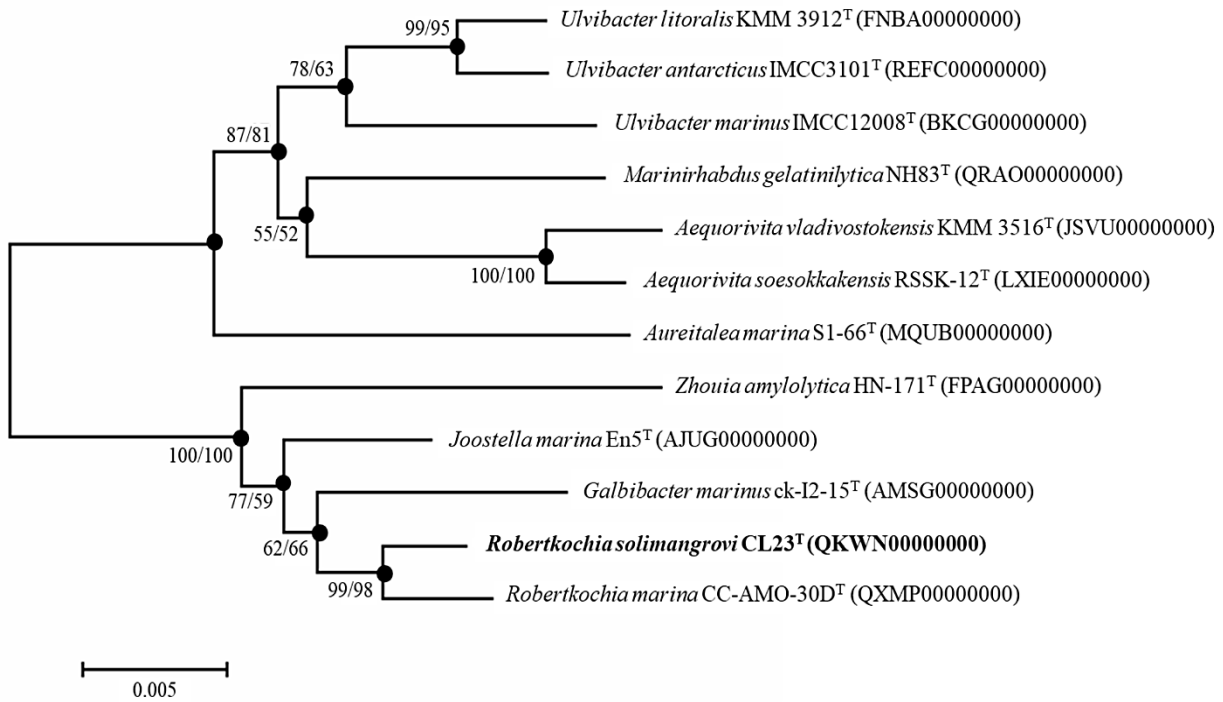

**Fig. S2.** Neighbor joining phylogenomic tree manifesting the relationship of strain CL23<sup>T</sup> with closely related taxa of family *Flavobacteriaceae*. Corresponding Genbank accession numbers are indicated in parentheses. Bootstrap values  $\geq 50\%$  based on 1000 resampled datasets are depicted as percentages at nodes. Bootstrap value from left to right for NJ and ML calculated with same sequence set. Filled circles indicate that corresponding nodes were also recovered in dendrograms generated using ML algorithm. Bar, 0.005 substitutions per nucleotide position.

## Supplementary tables

**Table S1.** List of potential genes for phosphatases, sulfur reduction and nitrate reduction encoded in the genome of strain CL23<sup>T</sup> and *R. marina* CC-AMO-30D<sup>T</sup>.

| Category                                  | Bacterial strain                     | NCBI Annotation                          | Accession                                |                                              |          |
|-------------------------------------------|--------------------------------------|------------------------------------------|------------------------------------------|----------------------------------------------|----------|
| Phosphatases                              | CL23 <sup>T</sup>                    | alkaline phosphatase family protein      | TRZ44267                                 |                                              |          |
|                                           |                                      | alkaline phosphatase                     | TRZ44500                                 |                                              |          |
|                                           |                                      | alkaline phosphatase                     | TRZ44343                                 |                                              |          |
|                                           |                                      | pyrophosphatase                          | TRZ44378                                 |                                              |          |
|                                           |                                      | sodium-translocating pyrophosphatase     | TRZ44400                                 |                                              |          |
|                                           |                                      | alkaline phosphatase family protein      | TRZ43533                                 |                                              |          |
|                                           |                                      | alkaline phosphatase family protein      | TRZ43596                                 |                                              |          |
|                                           |                                      | alkaline phosphatase                     | TRZ42861                                 |                                              |          |
|                                           |                                      | HAD family phosphatase                   | TRZ42760                                 |                                              |          |
|                                           |                                      | alkaline phosphatase family protein      | TRZ42969                                 |                                              |          |
|                                           |                                      | alkaline phosphatase family protein      | TRZ41972                                 |                                              |          |
|                                           |                                      | HAD family phosphatase                   | TRZ41063                                 |                                              |          |
|                                           |                                      | <i>R. marina</i> CC-AMO-30D <sup>T</sup> | alkaline phosphatase family protein      | TRZ46762                                     |          |
|                                           |                                      |                                          | alkaline phosphatase family protein      | TRZ45488                                     |          |
|                                           | alkaline phosphatase family protein  |                                          | TRZ45685                                 |                                              |          |
|                                           | sodium-translocating pyrophosphatase |                                          | TRZ44743                                 |                                              |          |
|                                           | HAD family phosphatase               |                                          | TRZ42656                                 |                                              |          |
|                                           | pyrophosphatase                      |                                          | TRZ41149                                 |                                              |          |
|                                           | Sulfur reduction                     | CL23 <sup>T</sup>                        | HAD family phosphatase                   | TRZ40862                                     |          |
|                                           |                                      |                                          | sulfate adenylyltransferase subunit CysN | TRZ46029                                     |          |
| sulfate adenylyltransferase subunit CysD  |                                      |                                          | TRZ46030                                 |                                              |          |
| adenylyl-sulfate kinase                   |                                      |                                          | TRZ46031                                 |                                              |          |
| phosphoadenylylsulfate reductase          |                                      |                                          | TRZ44200                                 |                                              |          |
| phosphoadenylylsulfate reductase          |                                      |                                          | TRZ42776                                 |                                              |          |
| FAD-binding oxidoreductase                |                                      |                                          | TRZ41175                                 |                                              |          |
| LLM class flavin-dependent oxidoreductase |                                      |                                          | TRZ41182                                 |                                              |          |
| <i>R. marina</i> CC-AMO-30D <sup>T</sup>  |                                      | sulfate adenylyltransferase subunit CysN | TRZ40960                                 |                                              |          |
|                                           |                                      | sulfate adenylyltransferase subunit CysD | TRZ40970                                 |                                              |          |
|                                           |                                      | adenylyl-sulfate kinase                  | TRZ40959                                 |                                              |          |
|                                           |                                      | phosphoadenylylsulfate reductase         | TRZ46694                                 |                                              |          |
|                                           |                                      | Nitrate reduction                        | CL23 <sup>T</sup>                        | nitrite reductase ( <i>NirBD</i> )           | TRZ44395 |
|                                           |                                      |                                          |                                          | nitrite reductase (NAD(P)H) ( <i>NirBD</i> ) | TRZ42280 |

|                                              |                                                                    |          |
|----------------------------------------------|--------------------------------------------------------------------|----------|
|                                              | nitrite reductase (NAD(P)H) small subunit<br>( <i>NirBD</i> )      | TRZ42281 |
|                                              | NAD(P)H-nitrite reductase ( <i>NirBD</i> )                         | TRZ42287 |
|                                              | ammonia-forming cytochrome c nitrite<br>reductase ( <i>NrfAH</i> ) | TRZ42033 |
|                                              | cytochrome c nitrite reductase small<br>subunit ( <i>NrfAH</i> )   | TRZ42034 |
| <i>R. marina</i> CC-<br>AMO-30D <sup>T</sup> | ammonia-forming cytochrome c nitrite<br>reductase ( <i>NrfAH</i> ) | TRZ44150 |
|                                              | cytochrome c nitrite reductase small<br>subunit ( <i>NrfAH</i> )   | TRZ44178 |
